# Supplementary material for: Social inhibition and behavioural flexibility when the context changes: a comparison across six primate species
Source: PubMed Central journal article supplement (PMC5814526; doi:10.1038/s41598-018-21496-6), 2018-02-15
Supplement: 41598_2018_21496_MOESM1_ESM.pdf [file 41598_2018_21496_MOESM1_ESM.pdf]

## TITLE PAGE

Title: Social inhibition and behavioural flexibility when the context changes: a comparison across six primate species.

Authors' names: Federica Amici <sup>1,2,\*</sup>, Josep Call <sup>3,4</sup>, Julia Watzek <sup>5</sup>, Sarah Brosnan <sup>5,6</sup>, Filippo Aureli <sup>7,8</sup>

### Affiliations:

<sup>1</sup> Institute of Biology, Faculty of Life Sciences, University of Leipzig, 04103 Leipzig, Germany

<sup>2</sup> Jr. Research Group "Primate Kin Selection", Department of Primatology, Max Planck Institute for Evolutionary Anthropology, 04103 Leipzig, Germany

<sup>3</sup> Department of Comparative and Developmental Psychology, Max Planck Institute for Evolutionary Anthropology, 04103 Leipzig, Germany

<sup>4</sup> School of Psychology and Neuroscience, University of St Andrews, St Andrews, KY16 9JP, Scotland, UK

<sup>5</sup> Department of Psychology and Language Research Center, Georgia State University, P.O. Box 5010, Atlanta, GA, USA

<sup>6</sup> Center for Behavioural Neuroscience and Neuroscience Institute, Georgia State University, P.O. Box 5030, Atlanta, GA, USA

<sup>7</sup> Instituto de Neuroetologia, Universidad Veracruzana, 91190 Xalapa, Veracruz, Mexico

<sup>8</sup> Research Centre in Evolutionary Anthropology and Palaeoecology, Liverpool John Moores University, L3 5UA Liverpool, UK

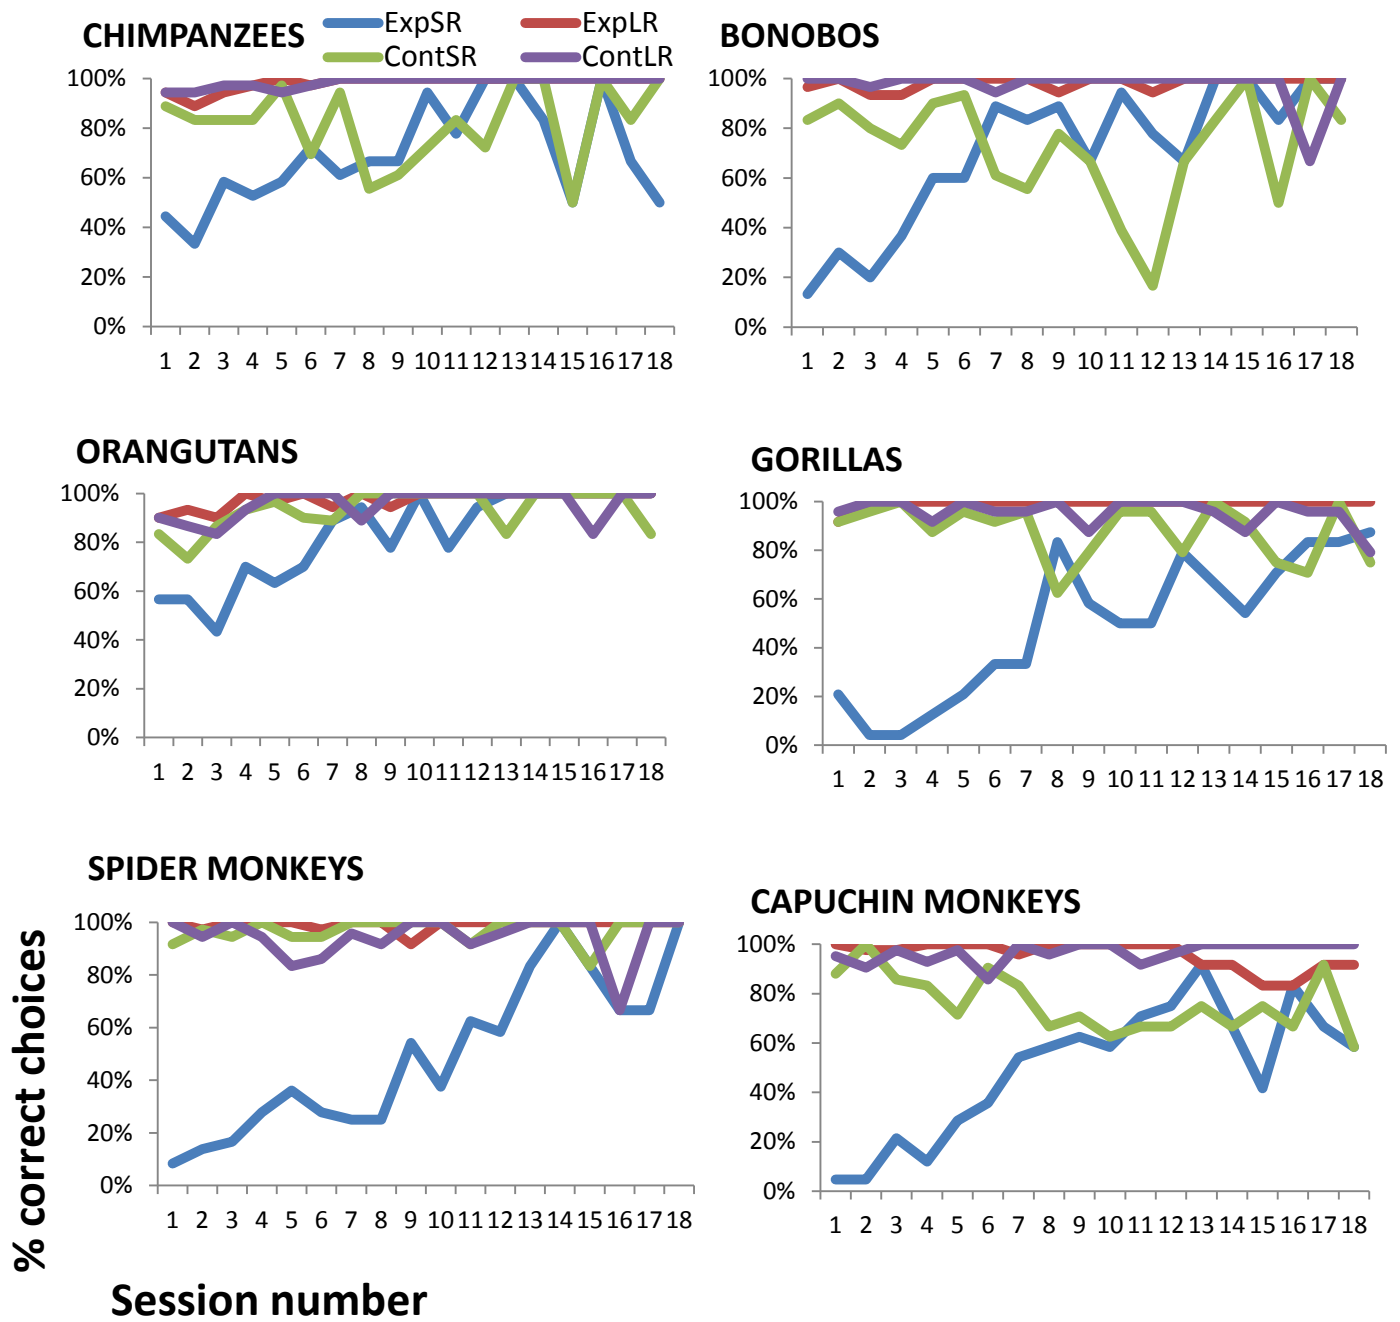

**FIGURE S1.** For each species and trial type, mean proportion of correct choices per session. Performance in ExpSR trials was used as a measure of inhibition. Performance in ContSR and ExpLR trials (and their comparison to ContLR trials) was used as a measure of behavioural flexibility. Please note how performance in ContSR trials tended to decrease in most species as performance in ExpSR reached a certain threshold.

**TABLE S1.** For each species, list of the dyads tested, with the order in which conditions were administered and the number of total partners for each subject.

| <b>SPECIES</b> | <b>SUBJECT</b> | <b>PARTNER</b> | <b>ORDER OF CONDITIONS</b> | <b>SUBJECT'S NUMBER OF PARTNERS</b> | <b>KINSHIP</b>    |
|----------------|----------------|----------------|----------------------------|-------------------------------------|-------------------|
| Chimpanzees    | Fraukje        | Kara           | EC                         | 3                                   | Mother-daughter   |
|                | Fraukje        | Lobo           | CE                         | 3                                   | None (5-10 years) |
|                | Fraukje        | Sandra         | EC                         | 3                                   | None (>10 years)  |
|                | Kara           | Kofi           | CE                         | 1                                   | Paternal siblings |
|                | Kofi           | Robert         | EC                         | 1                                   | Son-father        |
|                | Lobo           | Kofi           | CE                         | 2                                   | Paternal siblings |
|                | Lobo           | Robert         | EC                         | 2                                   | Son-father        |
|                | Robert         | Lobo           | CE                         | 1                                   | Father-son        |
|                | Sandra         | Fraukje        | CE                         | 2                                   | None (>10 years)  |
|                | Sandra         | Kara           | EC                         | 2                                   | Paternal siblings |
| Bonobos        | Fimi           | Kuno           | CE                         | 2                                   | Daughter-father   |
|                | Fimi           | Luisa          | EC                         | 2                                   | None (<5 years)   |
|                | Kuno           | Yasa           | CE                         | 1                                   | None (5-10 years) |
|                | Lexi           | Fimi           | EC                         | 2                                   | None (<5 years)   |
|                | Lexi           | Yasa           | CE                         | 2                                   | None (<5 years)   |
|                | Luisa          | Lexi           | EC                         | 1                                   | None (<5 years)   |
|                | Yasa           | Fimi           | EC                         | 3                                   | None (5-10 years) |
|                | Yasa           | Kuno           | EC                         | 3                                   | None (5-10 years) |
|                | Yasa           | Lexi           | CE                         | 3                                   | None (<5 years)   |
| Gorillas       | Abeku          | Kibara         | EC                         | 3                                   | None (<5 years)   |
|                | Abeku          | Kumili         | CE                         | 3                                   | None (<5 years)   |
|                | Abeku          | Viringika      | CE                         | 3                                   | None (<5 years)   |
|                | Kibara         | Abeku          | EC                         | 3                                   | None (<5 years)   |
|                | Kibara         | Kumili         | CE                         | 3                                   | None (<5 years)   |

|                     |              |             |    |   |                            |
|---------------------|--------------|-------------|----|---|----------------------------|
|                     | Kibara       | Viringika   | CE | 3 | Daughter-mother            |
|                     | Kumili       | Abeku       | EC | 3 | None (<5 years)            |
|                     | Kumili       | Kibara      | CE | 3 | None (<5 years)            |
|                     | Kumili       | Viringika   | EC | 3 | None (<5 years)            |
|                     | Viringika    | Abeku       | CE | 3 | None (<5 years)            |
|                     | Viringika    | Kibara      | EC | 3 | Mother-daughter            |
|                     | Viringika    | Kumili      | EC | 3 | None (<5 years)            |
| Orangutans          | Bimbo        | Padana      | CE | 1 | None (>10 years)           |
|                     | Dokana       | Bimbo       | EC | 3 | None (>10 years)           |
|                     | Dokana       | Padana      | EC | 3 | None (>10 years)           |
|                     | Dokana       | Pini        | CE | 3 | None (>10 years)           |
|                     | Padana       | Dokana      | CE | 2 | None (>10 years)           |
|                     | Padana       | Raja        | EC | 2 | Maternal paternal siblings |
|                     | Pini         | Bimbo       | CE | 2 | None (>10 years)           |
|                     | Pini         | Raja        | EC | 2 | Mother-daughter            |
|                     | Raja         | Pini        | EC | 1 | Daughter-mother            |
| Spider<br>monkeys   | Capocchetta  | Coco        | EC | 3 | None (>10 years)           |
|                     | Capocchetta  | PeloBlanco  | EC | 3 | None (<5 years)            |
|                     | Capocchetta  | RombaGrande | EC | 3 | None (>10 years)           |
|                     | Chavito      | Coco        | CE | 1 | None (>10 years)           |
|                     | Coco         | Chavito     | EC | 1 | None (>10 years)           |
|                     | PeloBlanco   | Chavito     | CE | 2 | None (<5 years)            |
|                     | PeloBlanco   | Coco        | EC | 2 | None (<5 years)            |
|                     | RombaGrande  | Chavito     | CE | 2 | None (>10 years)           |
|                     | RombaGrande  | Coco        | EC | 2 | None (>10 years)           |
|                     | RombaPequena | Coco        | CE | 2 | None (<5 years)            |
|                     | RombaPequena | PeloBlanco  | EC | 2 | None (<5 years)            |
| Capuchin<br>monkeys | Gabe         | Nkima       | CE | 1 | None (5-10 years)          |
|                     | Liam         | Gabe        | EC | 3 | None (5-10 years)          |

|  |       |         |    |   |                   |
|--|-------|---------|----|---|-------------------|
|  | Liam  | Gambit  | CE | 3 | None (5-10 years) |
|  | Liam  | Logan   | CE | 3 | Maternal siblings |
|  | Lily  | Griffin | CE | 1 | None (5-10 years) |
|  | Logan | Gabe    | CE | 3 | None (5-10 years) |
|  | Logan | Gambit  | EC | 3 | None (5-10 years) |
|  | Logan | Liam    | EC | 3 | Maternal siblings |
|  | Nala  | Gabe    | CE | 2 | None (5-10 years) |
|  | Nala  | Gambit  | EC | 2 | None (5-10 years) |
|  | Nkima | Gabe    | EC | 2 | None (5-10 years) |
|  | Nkima | Gambit  | CE | 2 | None (5-10 years) |
|  | Wren  | Lily    | EC | 1 | None (> 10 years) |

In Kinship we report whether the individuals in the dyad are maternal/paternal siblings (for capuchins, paternal relatedness is unknown), mother/father-offspring, or non-kin (specifying how many years they had lived in the same enclosure at the moment of testing).

**TABLE S2.** Post-hoc tests revealing differences across species in Model 1. Estimates, SE, z and p values are included for each test.

| <b>Contrast</b>                | <b>Estimate</b> | <b>SE</b>   | <b>z</b>    | <b>p</b>     |
|--------------------------------|-----------------|-------------|-------------|--------------|
| Orangutans - Chimpanzees       | 0.15            | 0.77        | 0.19        | 1.000        |
| Orangutans - Bonobos           | 1.18            | 0.79        | 1.49        | 0.673        |
| Orangutans - Spider Monkeys    | 1.77            | 0.75        | 2.36        | 0.172        |
| <i>Orangutans - Gorillas</i>   | <i>2.18</i>     | <i>0.81</i> | <i>2.68</i> | <i>0.080</i> |
| <b>Orangutans - Capuchins</b>  | <b>2.60</b>     | <b>0.76</b> | <b>3.43</b> | <b>0.008</b> |
| Chimpanzees - Bonobos          | 1.04            | 0.73        | 1.42        | 0.716        |
| Chimpanzees - Spider Monkeys   | 1.62            | 0.74        | 2.19        | 0.244        |
| Chimpanzees - Gorillas         | 2.03            | 0.87        | 2.35        | 0.174        |
| <b>Chimpanzees - Capuchins</b> | <b>2.45</b>     | <b>0.76</b> | <b>3.24</b> | <b>0.015</b> |
| Bonobos - Spider Monkeys       | 0.59            | 0.75        | 0.79        | 0.970        |
| Bonobos - Gorillas             | 1.00            | 0.90        | 1.12        | 0.875        |
| Bonobos - Capuchins            | 1.42            | 0.79        | 1.79        | 0.470        |
| Spider Monkeys - Gorillas      | 0.41            | 0.83        | 0.50        | 0.996        |
| Spider Monkeys - Capuchins     | 0.83            | 0.75        | 1.10        | 0.880        |
| Gorillas - Capuchins           | 0.42            | 0.88        | 0.47        | 0.997        |

Significant results in bold, trends in italics.

**TABLE S3.** For each trial type, post-hoc tests revealing differences across species in Models 2 and 3. Estimates, SE,  $z$  and  $p$  values are included for each significant test.

| Trial Type | Contrast                     | Model 2  |      |       |       | Model 3  |      |       |       |
|------------|------------------------------|----------|------|-------|-------|----------|------|-------|-------|
|            |                              | Estimate | SE   | $z$   | $p$   | Estimate | SE   | $z$   | $p$   |
| ExpLR      | Orangutans - Spider Monkeys  | -0.31    | 0.81 | -0.38 | 0.999 | 0.49     | 1.07 | 0.46  | 0.997 |
|            | Orangutans - Gorillas        | -2.23    | 0.98 | -2.29 | 0.200 | -1.17    | 1.30 | -0.90 | 0.947 |
|            | Orangutans - Chimpanzees     | 0.02     | 0.72 | 0.02  | 1.000 | -1.18    | 1.10 | -1.08 | 0.890 |
|            | Orangutans - Capuchins       | 0.06     | 0.70 | 0.09  | 1.000 | 0.85     | 1.01 | 0.84  | 0.960 |
|            | Orangutans - Bonobos         | 0.19     | 0.78 | 0.25  | 1.000 | -0.17    | 1.09 | -0.16 | 1.000 |
|            | Spider Monkeys - Gorillas    | -1.93    | 1.04 | -1.85 | 0.435 | -1.67    | 1.41 | -1.18 | 0.847 |
|            | Spider Monkeys - Chimpanzees | 0.32     | 0.80 | 0.40  | 0.999 | -1.68    | 1.23 | -1.36 | 0.752 |
|            | Spider Monkeys - Capuchins   | 0.37     | 0.79 | 0.46  | 0.997 | 0.35     | 1.17 | 0.30  | 1.000 |
|            | Spider Monkeys - Bonobos     | 0.50     | 0.84 | 0.59  | 0.992 | -0.67    | 1.22 | -0.55 | 0.994 |
|            | Gorillas - Chimpanzees       | 2.25     | 0.98 | 2.30  | 0.196 | -0.01    | 1.42 | -0.01 | 1.000 |
|            | Gorillas - Capuchins         | 2.29     | 0.97 | 2.35  | 0.173 | 2.02     | 1.35 | 1.49  | 0.671 |
|            | Gorillas - Bonobos           | 2.43     | 1.02 | 2.37  | 0.166 | 1.00     | 1.43 | 0.70  | 0.982 |
|            | Chimpanzees - Bonobos        | 0.18     | 0.74 | 0.24  | 1.000 | 1.01     | 1.22 | 0.83  | 0.962 |
|            | Chimpanzees - Capuchins      | 0.05     | 0.69 | 0.07  | 1.000 | 2.03     | 1.14 | 1.78  | 0.481 |

|        |                              |       |      |       |       |             |             |             |              |
|--------|------------------------------|-------|------|-------|-------|-------------|-------------|-------------|--------------|
|        | Capuchins - Bonobos          | 0.13  | 0.76 | 0.18  | 1.000 | -1.02       | 1.17        | -0.87       | 0.953        |
| ContLR | Orangutans - Spider Monkeys  | 1.05  | 0.66 | 1.59  | 0.606 | 2.06        | 0.88        | 2.35        | 0.174        |
|        | Orangutans - Gorillas        | -0.37 | 0.70 | -0.53 | 0.995 | 1.42        | 0.89        | 1.60        | 0.596        |
|        | Orangutans - Chimpanzees     | -0.59 | 0.71 | -0.83 | 0.962 | -0.61       | 0.96        | -0.63       | 0.989        |
|        | Orangutans - Capuchins       | 0.26  | 0.65 | 0.41  | 0.999 | 1.11        | 0.96        | 1.16        | 0.854        |
|        | Orangutans - Bonobos         | -0.88 | 0.83 | -1.06 | 0.896 | 0.38        | 0.96        | 0.39        | 0.999        |
|        | Spider Monkeys - Gorillas    | -1.43 | 0.68 | -2.09 | 0.295 | -0.64       | 0.86        | -0.74       | 0.977        |
|        | Spider Monkeys - Chimpanzees | -1.64 | 0.68 | -2.40 | 0.155 | -2.67       | 0.95        | -2.80       | 0.057        |
|        | Spider Monkeys - Capuchins   | -0.79 | 0.62 | -1.27 | 0.804 | -0.95       | 0.96        | -0.99       | 0.922        |
|        | Spider Monkeys - Bonobos     | -1.93 | 0.79 | -2.45 | 0.139 | -1.68       | 0.94        | -1.80       | 0.469        |
|        | Gorillas - Chimpanzees       | -0.21 | 0.74 | -0.29 | 1.000 | -2.03       | 0.93        | -2.18       | 0.246        |
|        | Gorillas - Capuchins         | 0.64  | 0.69 | 0.92  | 0.942 | -0.31       | 0.93        | -0.33       | 1.000        |
|        | Gorillas - Bonobos           | -0.51 | 0.85 | -0.60 | 0.991 | -1.04       | 0.95        | -1.10       | 0.882        |
|        | Chimpanzees - Capuchins      | 0.85  | 0.67 | 1.28  | 0.798 | 1.73        | 0.99        | 1.75        | 0.500        |
|        | Chimpanzees - Bonobos        | -0.30 | 0.82 | -0.36 | 0.999 | 0.99        | 0.99        | 1.00        | 0.918        |
|        | Capuchins - Bonobos          | -1.14 | 0.80 | -1.43 | 0.709 | -0.74       | 1.02        | -0.72       | 0.979        |
| ContSR | Orangutans - Spider Monkeys  | -0.10 | 0.67 | -0.14 | 1.000 | -0.32       | 0.89        | -0.36       | 0.999        |
|        | Orangutans - Gorillas        | 0.27  | 0.66 | 0.41  | 0.999 | 1.47        | 0.79        | 1.86        | 0.425        |
|        | Orangutans - Chimpanzees     | 1.37  | 0.61 | 2.25  | 0.215 | 1.62        | 0.75        | 2.17        | 0.253        |
|        | Orangutans - Capuchins       | 1.62  | 0.60 | 2.73  | 0.070 | <b>2.85</b> | <b>0.81</b> | <b>3.52</b> | <b>0.006</b> |



|                              |             |             |             |              |             |             |             |              |
|------------------------------|-------------|-------------|-------------|--------------|-------------|-------------|-------------|--------------|
| Orangutans - Bonobos         | <b>2.28</b> | <b>0.65</b> | <b>3.51</b> | <b>0.006</b> | <b>2.66</b> | <b>0.76</b> | <b>3.50</b> | <b>0.006</b> |
| Spider Monkeys - Gorillas    | 0.36        | 0.68        | 0.54        | 0.995        | 1.79        | 0.91        | 1.97        | 0.361        |
| Spider Monkeys - Chimpanzees | 1.47        | 0.63        | 2.35        | 0.174        | 1.94        | 0.88        | 2.21        | 0.235        |
| Spider Monkeys - Capuchins   | <i>1.72</i> | <i>0.62</i> | <i>2.79</i> | <i>0.060</i> | <b>3.17</b> | <b>0.95</b> | <b>3.34</b> | <b>0.011</b> |
| Spider Monkeys - Bonobos     | <b>2.37</b> | <b>0.64</b> | <b>3.70</b> | <b>0.003</b> | <b>2.98</b> | <b>0.88</b> | <b>3.41</b> | <b>0.009</b> |
| Gorillas - Chimpanzees       | 1.11        | 0.64        | 1.74        | 0.506        | 0.14        | 0.74        | 0.20        | 1.000        |
| Gorillas - Capuchins         | 1.35        | 0.64        | 2.13        | 0.270        | 1.37        | 0.81        | 1.70        | 0.534        |
| Gorillas - Bonobos           | <b>2.01</b> | <b>0.67</b> | <b>3.00</b> | <b>0.032</b> | 1.19        | 0.77        | 1.54        | 0.639        |
| Chimpanzees - Capuchins      | 0.25        | 0.55        | 0.45        | 0.998        | 1.23        | 0.74        | 1.65        | 0.563        |
| Chimpanzees - Bonobos        | 0.90        | 0.57        | 1.59        | 0.608        | 1.04        | 0.68        | 1.54        | 0.642        |
| Capuchins - Bonobos          | 0.65        | 0.60        | 1.10        | 0.884        | -0.19       | 0.80        | -0.23       | 1.000        |

---

Significant results in bold, trends in italics.

**TABLE S4.** For each species, post-hoc tests revealing significant differences of interest across trial types in Models 2 and 3. Estimates, SE, z and p values are included for each significant test.

| Species          | Contrast        | Model 2     |             |             |                 | Model 3     |             |             |                 |
|------------------|-----------------|-------------|-------------|-------------|-----------------|-------------|-------------|-------------|-----------------|
|                  |                 | Estimate    | SE          | z           | p               | Estimate    | SE          | z           | p               |
| Orangutans       | ContLR - ContSR | 0.53        | 0.32        | 1.64        | 0.228           | <b>1.38</b> | <b>0.42</b> | <b>3.27</b> | <b>0.003</b>    |
|                  | ExpLR - ContLR  | 0.49        | 0.40        | 1.23        | 0.433           | 0.16        | 0.53        | 0.30        | 0.952           |
| Spider monkeys   | ContLR - ContSR | 0.62        | 0.35        | 1.79        | 0.175           | -1.00       | 0.59        | -1.70       | 0.204           |
|                  | ExpLR - ContLR  | <b>1.85</b> | <b>0.53</b> | <b>3.50</b> | <b>0.001</b>    | <i>1.72</i> | <i>0.75</i> | <i>2.28</i> | <i>0.059</i>    |
| Gorillas         | ContLR - ContSR | <b>1.17</b> | <b>0.28</b> | <b>4.18</b> | <b>&lt;.001</b> | <b>1.44</b> | <b>0.33</b> | <b>4.37</b> | <b>&lt;.001</b> |
|                  | ExpLR - ContLR  | <b>2.35</b> | <b>0.73</b> | <b>3.21</b> | <b>0.004</b>    | <b>2.75</b> | <b>1.02</b> | <b>2.70</b> | <b>0.019</b>    |
| Chimpanzees      | ContLR - ContSR | <b>2.49</b> | <b>0.38</b> | <b>6.59</b> | <b>&lt;.001</b> | <b>3.61</b> | <b>0.56</b> | <b>6.48</b> | <b>&lt;.001</b> |
|                  | ExpLR - ContLR  | 0.11        | 0.47        | 0.24        | 0.969           | 0.73        | 0.87        | 0.83        | 0.683           |
| Capuchin monkeys | ContLR - ContSR | <b>1.89</b> | <b>0.26</b> | <b>7.34</b> | <b>&lt;.001</b> | <b>3.12</b> | <b>0.45</b> | <b>6.87</b> | <b>&lt;.001</b> |
|                  | ExpLR - ContLR  | 0.69        | 0.38        | 1.83        | 0.161           | 0.42        | 0.65        | 0.65        | 0.794           |
| Bonobos          | ContLR - ContSR | <b>3.69</b> | <b>0.53</b> | <b>6.99</b> | <b>&lt;.001</b> | <b>3.67</b> | <b>0.55</b> | <b>6.64</b> | <b>&lt;.001</b> |
|                  | ExpLR - ContLR  | 0.59        | 0.63        | 0.93        | 0.622           | 0.71        | 0.87        | 0.81        | 0.697           |

Significant results in bold, trends in italics.
